# Supplementary material
Source: publisher site journal article supplement (https://www.dovepress.com/article/446636)
Supplement: Supplementary file 1 [file get_supplementary_file.php]

**EXACERBATION BURDEN IN COPD AND OCCURRENCE OF MORTALITY IN A COHORT OF ITALIAN PATIENTS: RESULTS OF THE GULP STUDY**

**Authors**

Pierachille Santus1, Fabiano Di Marco2, Fulvio Braido3, Marco Contoli4, Angelo Corsico5, Claudio Micheletto6, Girolamo Pelaia7, Dejan Radovanovic1, Paola Rogliani8, Laura Saderi9, Nicola Scichilone10, Silvia Tanzi11, Manlio Vella11, Silvia Boarino11, Giovanni Sotgiu9 and Paolo Solidoro12

**Affiliations**

1 Department of Biomedical and Clinical Sciences (DIBIC), Università degli Studi di Milano, Division of Respiratory Diseases, Ospedale L. Sacco, ASST Fatebenefratelli-Sacco, Milano, Italy; 2Department of Health Sciences, Università degli Studi di Milano, Pneumology, ASST Papa Giovanni XXIII, Bergamo, Italy; 3Department of Internal Medicine (DiMI), Respiratory Unit for Continuity of Care, IRCCS Ospedale Policlinico San Martino, University of Genova, Genova, Italy; 4 Department of Translational Medicine, Respiratory Section, , University of Ferrara, Ferrara, Italy; 5Department of Medical Sciences and Infective Diseases, Unit of Respiratory Diseases, IRCCS Policlinico San Matteo Foundation and University of Pavia Medical School, Pavia, Italy; 6 Cardio-Thoracic Department, Respiratory Unit, University Integrated Hospital, Verona, Italy; 7Dipartimento di Scienze della Salute, Università Magna Graecia, Catanzaro, Italy; 8 Department of Experimental Medicine, Unit of Respiratory Medicine, University of Rome "Tor Vergata", Division of Respiratory Medicine, University Hospital "Tor Vergata", Rome, Italy; ; 9Department of Medicine, Surgery and Pharmacy, University of Sassari, Sassari, Italy; 10Biomedical Department of Internal and Specialist Medicine, University of Palermo, Palermo, Italy; 11AstraZeneca Italia, Milan, Italy; 12 Department of Medical Sciences, University of Turin, S.C. Pneumologia, Azienda Ospedaliero Universitaria Città della Salute e della Scienza, Torino, Italy.

**Supplementary material**

**Supplementary table 1. Descriptive analysis by mortality**

| **Variable** | | **Alive (n= 745)** | **Dead (n= 114)** | **p-value** |
| --- | --- | --- | --- | --- |
| *Male, n (%)* | | 549 (73.7) | 87 (76.3) | 0.55 |
| *Median (IQR) age, years* | | 76 (70-81) | 80 (74-84) | <0.0001 |
| *Age group, n (%)* | *<65 years* | 75 (10.1) | 6 (5.3) | 0.0009 |
| *65-75 years* | 279 (37.5) | 31 (27.2) |
| *>75 year* | 391 (52.5) | 77 (67.5) |
| *Median (IQR) BMI* | | 26.7 (23.7-29.4) | 25.5 (22.7-29.0) | 0.02 |
| *Smoking, n (%)* | *Non-smoker* | 25 (3.4) | 7 (6.2) | 0.05 |
| *Active smoker* | 518 (70.4) | 87 (77.0) |
| *Former smoker* | 193 (26.2) | 19 (16.8) |
| *Median (IQR) FEV1, liters* | | 1.410 (990-1.880) | 1.140 (820-1.670) | 0.001 |
| *Median (IQR) IC, liters* | | 2.015 (1.520-2.495) | 1.740 (1.300-2.1150) | 0.0001 |
| **2017** | |  |  |  |
| *Median (IQR) moderate exacerbation* | | 0 (0-1) | 0 (0-1) | 0.58 |
| *Median (IQR) severe exacerbation* | | 0 (0-1) | 0 (0-1) | 0.50 |
| *≥1 exacerbation, n (%)* | | 479 (67.8) | 59 (70.2) | 0.64 |
| *Exacerbation category, n (%)* | *Category A: 0 exacerbations* | 358 (49.8) | 43 (42.2) | 0.002 |
| *Category B: 1 moderate exacerbation* | 121 (16.8) | 14 (13.7) |
| *Category C: 1 severe exacerbation* | 73 (10.2) | 24 (23.5) |
| *Category D: ≥2 moderate and/or severe* | 167 (23.2) | 21 (20.6) |
| *COPD therapy 2017, n (%)* | *No therapy* | 3 (0.4) | 0 (0.0) | 0.59 |
| *LABA* | 14 (2.1) | 1 (1.8) |
| *LAMA* | 86 (12.6) | 6 (10.5) |
| *LABA/LAMA* | 193 (28.3) | 14 (24.6) |
| *ICS/LABA* | 59 (8.7) | 2 (3.5) |
| *ICS/LABA/LAMA* | 326 (47.9) | 34 (59.7) |
| *Chronic heart failure* | | 106 (14.2) | 31 (27.2) | <0.0001 |
| *Ischemic heart disease* | | 129 (17.3) | 32 (28.1) | 0.006 |
| *Peripheral vascular disease* | | 108 (14.5) | 17 (14.9) | 0.91 |
| *Diabetes* | | 101 (13.6) | 12 (10.5) | 0.37 |
| *Liver disease* | | 61 (8.2) | 8 (7.0) | 0.67 |
| *Renal disease* | | 63 (8.5) | 15 (13.2) | 0.10 |

**Supplementary Figure 1. Mortality according to exacerbation history in categories A, B, C and D.**


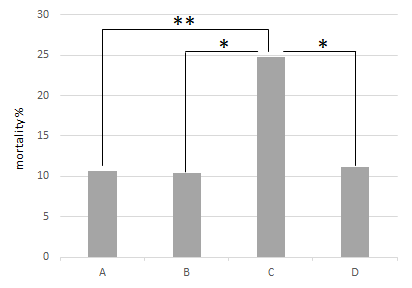


Mortality is represented as percentage of dead patients in each category. Group A (43 patients, 10.7%); B (14 patients, 10.4%); C (24 patients, 24.7%) and D (21 patients, 11.2%). Category A = patients with no history of exacerbations before entering the trial; B = 1 moderate exacerbation; C = 1 severe exacerbation; D = ≥2 moderate and/or severe exacerbations. *A vs. C p-value= 0.0003; B vs. C p-value= 0.004; C vs. D p-value= 0.003; ** A vs C p-value <0.001.
